# Supplementary material for: Comprehensive Characterization of a Next-Generation Antiviral T-Cell Product and Feasibility for Application in Immunosuppressed Transplant Patients
Source: PubMed Central journal article supplement (PMC6546853; doi:10.3389/fimmu.2019.01148), 2019-05-28
Supplement: Presentation_1.pdf [file Presentation_1.pdf]

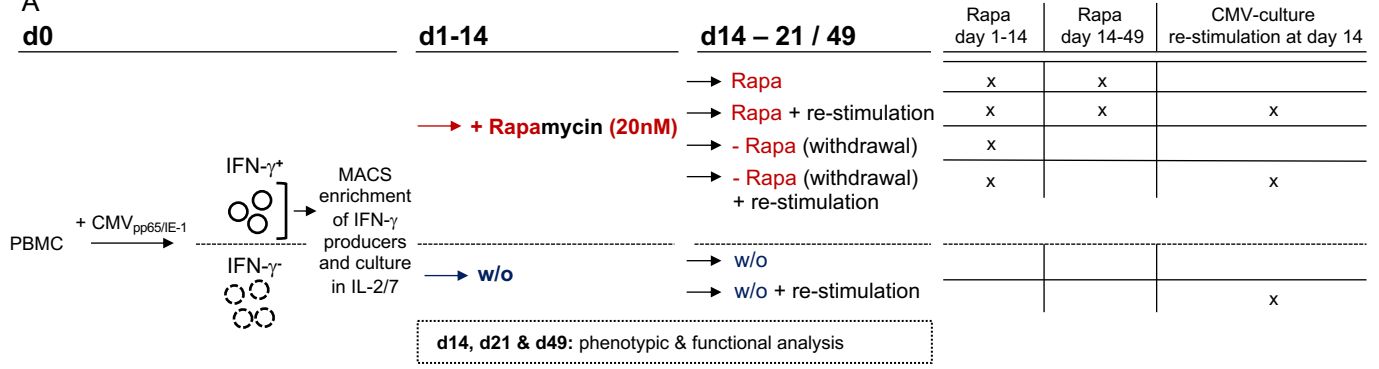

**d14: Enrichment of CD4<sup>+</sup> T-cells and T<sub>CM</sub> at d14**

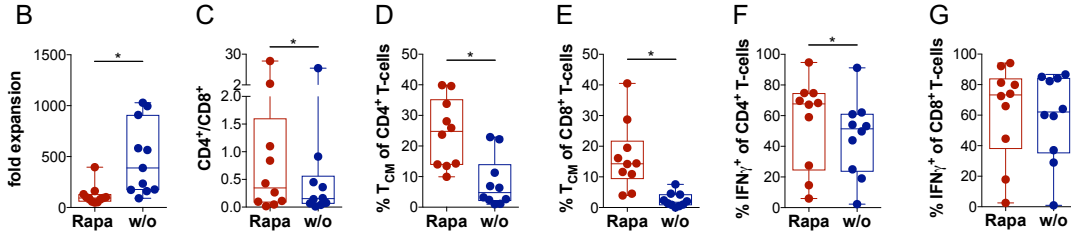

**d21: Recovered expansion rates at d21, antigen encounter decreases expansion rates, but promotes less differentiated cells**

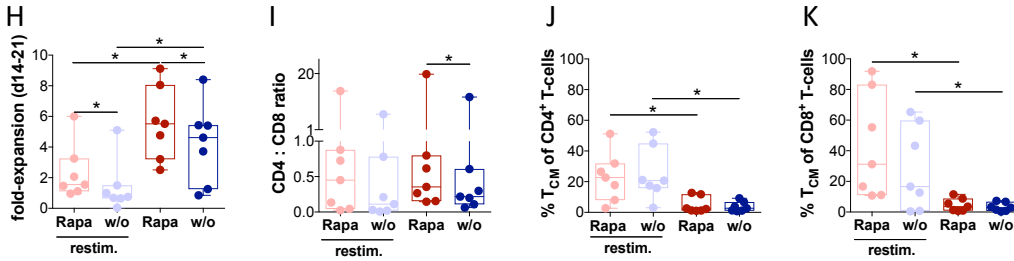

**d49: Rapamycin preserves superior capacity for IFN $\gamma$  production**

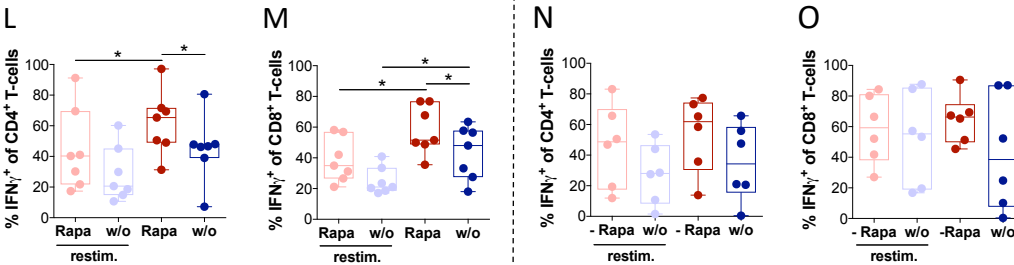

**Figure S1: Effects of Rapamycin on IL-2/IL-7-expanded T-cell products: Expansion, phenotype and function**

**A:** Schematic overview of experiments: T-cell products (TCPs) were generated from PBMCs isolated from venous blood of healthy donors (HDs) by magnetically activated cell isolation sorting (MACS) of T-cells producing IFN $\gamma$  in response to stimulation with CMV<sub>IE-1/pp65</sub> peptide pools and expanded in the presence of IL-2/IL-7 without (w/o; blue) or with addition of 20 nM of Rapamycin (Rapa; red). **B:** Expansion rates of IL-2/7-expanded Rapa-treated (Rapa-)TCPs (red) and untreated TCPs (blue) of n=10 healthy donors (HDs) calculated from yield at d14 divided by the number of seeded cells at d0. We gated flow cytometric data on lymphocytes → singlets → living CD3<sup>+</sup> T-cells. **C:** CD4/CD8 ratios in Rapa- (red) and untreated TCPs (blue) of n=10 HDs calculated from flow cytometry data as presented in Fig. 1C. **D-E:** Proportions of CD4<sup>+</sup> (**D**) and CD8<sup>+</sup> T<sub>CM</sub> (**E**) among Rapa- (red) and untreated TCPs (blue) of n=10 HDs determined from flow cytometric data as shown in Fig. 1E at d14. **F-G:** To detect CMV-specific cytokine producers, TCPs were stimulated with CMV<sub>IE-1/pp65</sub> peptide-loaded autologous LCLs at a ratio of 1:10 for 6 h and BFA was added after 1 h. Proportions of CMV-specific IFN $\gamma$ -producers among CD4<sup>+</sup> (**F**) and CD8<sup>+</sup> T-cells (**G**) in Rapa- (red) and untreated TCPs (blue) of n=10 HDs determined from flow cytometric data as shown in Fig. 1G at d14. **H-O:** For restimulation on d14 of culture, thawed CD3<sup>+</sup> autologous PBMCs were loaded with CMV<sub>IE-1/pp65</sub> peptide pools and added at 1:5 ratio to T-cells. **H:** Expansion rates of IL-2/7-expanded restimulated (pastel colors) or non-restimulated (dark colors) Rapa- (red) and untreated TCPs (blue) of n=7 HDs calculated from yield at d21 divided by the number of cells at d14. **I:** CD4/CD8 ratios in Rapa- (red) and untreated TCPs (blue) of n=7 HDs calculated from flow cytometric data as presented in Fig. 1C at d21. **J-K:** Proportions of CD4<sup>+</sup> (**J**) and CD8<sup>+</sup> T<sub>CM</sub> (**K**) among Rapa- (red) and untreated TCPs (blue) of n = 7 HDs determined from flow cytometric data as shown in Fig. 1E at d21. **L-M:** To detect CMV-specific cytokine producers, TCPs were stimulated with CMV<sub>IE-1/pp65</sub> peptide-loaded autologous LCLs for 6 h and BFA was added after 1 h. Proportions of CMV-specific IFN $\gamma$ -producers among CD4<sup>+</sup> (**L**) and CD8<sup>+</sup> T-cells (**M**) in Rapa- (red) and untreated TCPs (blue) of n=7 HDs determined from flow cytometric data as shown in Fig. 1G at d21. **N-O:** To mimic the situation after infusion, Rapa was withdrawn and TCPs were cultivated long-term until d49. Proportions of CMV-specific IFN $\gamma$ -producers among CD4<sup>+</sup> (**N**) and CD8<sup>+</sup> T-cells (**O**) in TCPs withdrawn from Rapa (red) and untreated TCPs (blue) of n=6 HDs determined from flow cytometric data as shown in Fig. 1G at d49. For all graphs normal distribution of data points was tested with Kolmogorov-Smirnov test and paired t test was used to determine significance in normally distributed samples or Wilcoxon's matched-pairs signed rank test in not normally distributed samples, respectively. P-values below 0.05 are indicated by \* and defined to be significant.

**Table S1:** Differentially expressed genes. Log2-fold describes log2-fold expression of the respective gene in untreated vs. Rap2-TCPs.

|                                                    | Ensemble ID          | Gene                                                                                                                               | Function in T-cells                                                                                                                                                                                                                                                           | baseMean                                                                                                                                                                                                   | log2Fold   |                 | Ensemble ID                                                                  | Gene                                                                                                  | Function in T-cells | baseMean | log2Fold |  |
|----------------------------------------------------|----------------------|------------------------------------------------------------------------------------------------------------------------------------|-------------------------------------------------------------------------------------------------------------------------------------------------------------------------------------------------------------------------------------------------------------------------------|------------------------------------------------------------------------------------------------------------------------------------------------------------------------------------------------------------|------------|-----------------|------------------------------------------------------------------------------|-------------------------------------------------------------------------------------------------------|---------------------|----------|----------|--|
| <b>LONG-LIVED MEMORY</b>                           | <b>PROMOTING</b>     |                                                                                                                                    |                                                                                                                                                                                                                                                                               |                                                                                                                                                                                                            |            |                 |                                                                              |                                                                                                       |                     |          |          |  |
|                                                    | ENSG00000164530      | PI16                                                                                                                               | unique subset of memory T helper $\alpha\alpha$ cells with hyperproliferative and proinflammatory properties (1)                                                                                                                                                              | 135.857891                                                                                                                                                                                                 | -4.52067   | ENSG00000196507 | TCEAL3                                                                       | transcription elongation factor                                                                       | 98.9871397          | -2.19082 |          |  |
|                                                    | ENSG00000163813      | CCRA                                                                                                                               | innate CD8 T cell memory subset (2)                                                                                                                                                                                                                                           | 228.819399                                                                                                                                                                                                 | -3.97254   | ENSG00000175155 | YPEL2                                                                        | part of the mitotic apparatus required for cell division (83)                                         | 1404.32006          | -1.19115 |          |  |
|                                                    | ENSG00000128353      | CCR7                                                                                                                               | Tau marker (3)                                                                                                                                                                                                                                                                | 2184.22723                                                                                                                                                                                                 | -3.76723   | ENSG00000048886 | CH3L2                                                                        | activation of ERK1/2 phosphorylation by CH3L2 inhibits cell mitogenesis and proliferation (84)        | 183.237131          | 1.18076  |          |  |
|                                                    | ENSG00000056736      | IL17RB                                                                                                                             | highest expression in CD4+ T cells expressing prostaglandin receptor D2 (T1u) (4)                                                                                                                                                                                             | 3717.7812                                                                                                                                                                                                  | -1.98748   | ENSG00000102302 | NME4                                                                         | involved in Pyrimidine Metabolism and Metabolism                                                      | 325.68844           | -1.87288 |          |  |
|                                                    | ENSG00000204252      | HLA-DQA                                                                                                                            | non-classical MHC class II (peptide loading), higher expression in CD8 CD28+ T-cells from young than from old subjects (5)                                                                                                                                                    | 1363.3723                                                                                                                                                                                                  | -2.28921   | ENSG00000174136 | RGMB                                                                         | involved in T cell activation and supports T-cell expansion (67)                                      | 181.82579           | -2.82547 |          |  |
|                                                    | ENSG00000073331      | ALPK1                                                                                                                              | target of Tet-1 (6) downstream of Akt (arresting memory CD8+ T-cell differentiation (7))                                                                                                                                                                                      | 404.02766                                                                                                                                                                                                  | -1.89246   | TNFRSF19        | cell cycle regulated NADPH-dependent dicarboxylate reductase enzyme (85)     | 52.286621                                                                                             | -2.60785            |          |          |  |
|                                                    | ENSG00000135318      | TERE                                                                                                                               | CD73 catalyses the conversion of extracellular nucleotides to membrane-permeable nucleosides, CD73+ mouse memory CD4+ T-cells make IL-2, but less IFN $\gamma$ than CD73- (8)                                                                                                 | 278.662059                                                                                                                                                                                                 | -2.20378   | DHR22           | ligand for UDP-glucose, activation inhibits murine T cell proliferation (86) | 68.738987                                                                                             | -2.18412            |          |          |  |
|                                                    | ENSG00000164362      | NKX2                                                                                                                               | Telomerase reverse transcriptase, overexpression extends proliferative potential of human T-cells (9)                                                                                                                                                                         | 27.7024907                                                                                                                                                                                                 | -3.43006   | ENSG00000164362 | TERT                                                                         | Telomerase Reverse Transcriptase, overexpression extends proliferative potential of human T-cells (9) | 27.7024907          | -3.43006 |          |  |
|                                                    | ENSG00000116016      | ELP1                                                                                                                               | allows Tau expansion in Rapamycin (10), antipoptotic/upregulated in Tau vs. Tau (11)                                                                                                                                                                                          | 7644.0849                                                                                                                                                                                                  | -1.735721  | ENSG0000011860  | CSMR1                                                                        | enhances naive CD4+ T-cell activation, survival and proliferation via PI3K/Akt (50)                   | 200.01984           | -2.11075 |          |  |
|                                                    | ENSG00000168885      | ILTR                                                                                                                               | accumulates upon early TCR signaling and hypoxia, accumulation increases glycolysis/G2M, expression diminished upon administration of IL-2, increased upon administration of IL-4, sustained effector function of CD8 CTLs (12)                                               | 3957.70915                                                                                                                                                                                                 | -1.55463   |                 |                                                                              |                                                                                                       |                     |          |          |  |
|                                                    | ENSG00000132170      | PPARG                                                                                                                              | identifies the effector CD8 memory T-cell precursors that can persist and confer protective immunity (13)                                                                                                                                                                     | 11962.7635                                                                                                                                                                                                 | -2.044891  |                 |                                                                              |                                                                                                       |                     |          |          |  |
|                                                    | ENSG00000072110      | ACTN1                                                                                                                              | required for long-term persistence of CD8+ T-cells in the skin, upregulated on Tau (14)                                                                                                                                                                                       | 391.15506                                                                                                                                                                                                  | -2.14384   |                 |                                                                              |                                                                                                       |                     |          |          |  |
|                                                    | ENSG00000143674      | MAP3K21                                                                                                                            | downregulated in effector/exhausted murine T-cells compared to memory T-cells (15)                                                                                                                                                                                            | 1155.07765                                                                                                                                                                                                 | -1.455754  |                 |                                                                              |                                                                                                       |                     |          |          |  |
|                                                    | ENSG00000140343      | IGF1R                                                                                                                              | bivalent methylation in CD8+ Tc and Tau allows rapid switch from a resting to activated state, transcription increased upon activation (16)                                                                                                                                   | 193.130633                                                                                                                                                                                                 | -1.70155   |                 |                                                                              |                                                                                                       |                     |          |          |  |
|                                                    | ENSG00000159896      | PLCL1                                                                                                                              | increased in autoimmunity, increased upon TCR stimulation, ligand binding enhances proliferation and survival of CD45RO+ T-cells (17)                                                                                                                                         | 797.424827                                                                                                                                                                                                 | -1.791784  |                 |                                                                              |                                                                                                       |                     |          |          |  |
|                                                    | ENSG00000140423      | IGFBP3                                                                                                                             | CD25 methylation decreased in memory vs. naive CD4+ upregulated upon activation with CD3/CD28 for 48 h (18)                                                                                                                                                                   | 2484.05367                                                                                                                                                                                                 | -2.708713  |                 |                                                                              |                                                                                                       |                     |          |          |  |
|                                                    | ENSG00000162490      | DRAXN                                                                                                                              | antagonist of Wnt signaling (20)                                                                                                                                                                                                                                              | 221.61933                                                                                                                                                                                                  | 1.84185    |                 |                                                                              |                                                                                                       |                     |          |          |  |
|                                                    | ENSG00000148053      | NTRK2                                                                                                                              | downregulated on CD4+ CD62L+ T-cells compared to CD62L- (21)                                                                                                                                                                                                                  | 608.962631                                                                                                                                                                                                 | -2.751809  |                 |                                                                              |                                                                                                       |                     |          |          |  |
|                                                    | ENSG00000149295      | DRD2                                                                                                                               | dopamine receptor, drives Tau differentiation via T-bet and IFN $\gamma$ production, decreases CD25 and CD69, advances T-cell differentiation, helps NFkB activation (22)                                                                                                     | 30.4424689                                                                                                                                                                                                 | -3.125411  |                 |                                                                              |                                                                                                       |                     |          |          |  |
| <b>EFFECTOR FUNCTION</b>                           | ENSG00000173334      | TRIB1                                                                                                                              | in transplant patients marker of ongoing immune activation and an antibody response (23), 40 higher expression in $T_{H1}$ than $T_{H2}$ , but 47 of culture higher expression in $T_{H2}$ than $T_{H1}$ (24)                                                                 | 550.825277                                                                                                                                                                                                 | -2.851495  |                 |                                                                              |                                                                                                       |                     |          |          |  |
|                                                    | ENSG00000137265      | IRF4                                                                                                                               | induced by TCR signaling $\rightarrow$ upregulation of inhibitory receptor/impairs metabolism $\rightarrow$ T-cell exhaustion (25); induction dependent on the signal strength of TCR signaling $\rightarrow$ glycolysational expansion/maintenance of effector function (26) | 7024.41145                                                                                                                                                                                                 | -1.335874  |                 |                                                                              |                                                                                                       |                     |          |          |  |
|                                                    | ENSG00000189013      | KIR2DL4                                                                                                                            | receptor for HLA-G, activation prevents cytotoxicity, HLA-G increases expression on CD4+ T-cells (27), increased demethylation of promoter and expression in effector vs. memory T-cells (28)                                                                                 | 19.941967                                                                                                                                                                                                  | 3.054789   |                 |                                                                              |                                                                                                       |                     |          |          |  |
|                                                    | ENSG00000124772      | CPN5                                                                                                                               | expression higher in effector than memory CD4+ T-cells (29)                                                                                                                                                                                                                   | 603.623657                                                                                                                                                                                                 | 1.930024   |                 |                                                                              |                                                                                                       |                     |          |          |  |
|                                                    | ENSG00000168229      | PTGDR                                                                                                                              | higher expression in $T_{H1}$ than other T-cells (30)                                                                                                                                                                                                                         | 371.556901                                                                                                                                                                                                 | 2.575663   |                 |                                                                              |                                                                                                       |                     |          |          |  |
|                                                    | ENSG00000165025      | SYK                                                                                                                                | switches TCR signaling from naive/memory to effector CD4+ T-cells (31)                                                                                                                                                                                                        | 131.51078                                                                                                                                                                                                  | 2.81686    |                 |                                                                              |                                                                                                       |                     |          |          |  |
|                                                    | ENSG00000170854      | RIOK2                                                                                                                              | represses expression of IL-4 (32)                                                                                                                                                                                                                                             | 264.81806                                                                                                                                                                                                  | -1.42225   |                 |                                                                              |                                                                                                       |                     |          |          |  |
|                                                    | ENSG00000169885      | OSM                                                                                                                                | pro-inflammatory cytokine, attracts macrophages, induces antiviral response in epithelial cells (33, 34)                                                                                                                                                                      | 1983.6564                                                                                                                                                                                                  | -1.98649   |                 |                                                                              |                                                                                                       |                     |          |          |  |
|                                                    | ENSG00000162968      | SATB1                                                                                                                              | required for suppressive function of $T_{H2}$ and suppressor of effector differentiation (35)                                                                                                                                                                                 | 11007.1072                                                                                                                                                                                                 | -1.273391  |                 |                                                                              |                                                                                                       |                     |          |          |  |
|                                                    | ENSG00000108176      | DNAJ21                                                                                                                             | chaperone, co-factor of Hsp70 (36), which induces cytotoxic CD4+ T-cells (37)                                                                                                                                                                                                 | 113.63151                                                                                                                                                                                                  | -3.00366   |                 |                                                                              |                                                                                                       |                     |          |          |  |
|                                                    | ENSG00000160116      | EMX1                                                                                                                               | accumulates upon early TCR signaling and hypoxia, accumulation increases glycolysis/G2M, expression diminished upon administration of IL-2, increased upon administration of IL-4, sustained effector function of CD8 CTLs (12)                                               | 3957.09145                                                                                                                                                                                                 | -1.554453  |                 |                                                                              |                                                                                                       |                     |          |          |  |
|                                                    | ENSG00000169194      | IL13                                                                                                                               | synergizes with IL-2 in regulating interferon-gamma synthesis (38)                                                                                                                                                                                                            | 481.784448                                                                                                                                                                                                 | -2.918254  |                 |                                                                              |                                                                                                       |                     |          |          |  |
|                                                    | ENSG00000149295      | DRD2                                                                                                                               | dopamine receptor, drives Tau differentiation via T-bet and IFN $\gamma$ production, decreases CD25 and CD69, advances T-cell differentiation, helps NFkB activation (22)                                                                                                     | 30.4424689                                                                                                                                                                                                 | -3.125411  |                 |                                                                              |                                                                                                       |                     |          |          |  |
|                                                    | ENSG00000154465      | TNFRSF11A                                                                                                                          | RNAK1, increases T-cell survival upon binding of RANKL (39); RANKL increases IFN $\gamma$ secretion T-cells (40)                                                                                                                                                              | 1997.55281                                                                                                                                                                                                 | -2.813605  |                 |                                                                              |                                                                                                       |                     |          |          |  |
|                                                    | <b>APOPTOSIS</b>     | <b>anti-apoptotic</b>                                                                                                              |                                                                                                                                                                                                                                                                               |                                                                                                                                                                                                            |            |                 |                                                                              |                                                                                                       |                     |          |          |  |
|                                                    |                      | ENSG00000118513                                                                                                                    | MYB                                                                                                                                                                                                                                                                           | promotes memory T-cell development, antiapoptotic via Bcl-1 (41)                                                                                                                                           | 1103.23321 | -3.78842        |                                                                              |                                                                                                       |                     |          |          |  |
|                                                    |                      | ENSG00000141655                                                                                                                    | TNFRSF11A                                                                                                                                                                                                                                                                     | RANKL increases T-cell survival upon binding of RANKL (39); RANKL increases IFN $\gamma$ secretion in effector and memory T-cells (40)                                                                     | 1997.55281 | -2.813605       |                                                                              |                                                                                                       |                     |          |          |  |
|                                                    |                      | ENSG00000134278                                                                                                                    | SPFR1                                                                                                                                                                                                                                                                         | involved in DNA repair (42)                                                                                                                                                                                | 205.11297  | -2.942319       |                                                                              |                                                                                                       |                     |          |          |  |
|                                                    |                      | ENSG00000134853                                                                                                                    | PDGFRA                                                                                                                                                                                                                                                                        | anti-apoptotic signaling via PI3K/migration (43)                                                                                                                                                           | 124.06083  | -4.193055       |                                                                              |                                                                                                       |                     |          |          |  |
|                                                    |                      | ENSG00000205755                                                                                                                    | CHRF2                                                                                                                                                                                                                                                                         | thyric stromal lymphopoiesis receptor, closely related to gamma chain, expression increased after TCR activation, signaling increases survival of T-cells and proliferation of activated CD4+ T-cells (44) | 130.186039 | -1.804407       |                                                                              |                                                                                                       |                     |          |          |  |
| ENSG00000128778                                    |                      | SIRT1                                                                                                                              | allows Tau expansion in Rapamycin (10), antipoptotic/upregulated in Tau vs. Tau (11)                                                                                                                                                                                          | 95.262504                                                                                                                                                                                                  | -3.407825  |                 |                                                                              |                                                                                                       |                     |          |          |  |
| ENSG00000102096                                    |                      | PIK2                                                                                                                               | allows Tau expansion in Rapamycin (10), antipoptotic/upregulated in Tau vs. Tau (11)                                                                                                                                                                                          | 794.4009                                                                                                                                                                                                   | -1.752741  |                 |                                                                              |                                                                                                       |                     |          |          |  |
| ENSG00000138026                                    |                      | IGKAP                                                                                                                              | p63, can suppress p73-dependent apoptosis (46)                                                                                                                                                                                                                                | 825.271346                                                                                                                                                                                                 | -2.023846  |                 |                                                                              |                                                                                                       |                     |          |          |  |
| ENSG00000140443                                    |                      | IFR4                                                                                                                               | increased in autoimmunity, increased upon TCR stimulation, ligand binding enhances proliferation and survival of CD45RO+ T-cells (17)                                                                                                                                         | 797.424827                                                                                                                                                                                                 | -1.791784  |                 |                                                                              |                                                                                                       |                     |          |          |  |
| ENSG00000180534                                    |                      | TPSTY15                                                                                                                            | decreases p53 levels (47)                                                                                                                                                                                                                                                     | 98.8277414                                                                                                                                                                                                 | -1.991591  |                 |                                                                              |                                                                                                       |                     |          |          |  |
| ENSG00000131343                                    |                      | BEX3                                                                                                                               | protects against mitochondrial apoptosis, positively regulates Bcl-2/NFkB pathway and negatively regulates BAD, BAK1 and PUMA (48)                                                                                                                                            | 199.28887                                                                                                                                                                                                  | 2.151393   |                 |                                                                              |                                                                                                       |                     |          |          |  |
| ENSG0000011028                                     |                      | MRC2                                                                                                                               | Mannose receptor, extends survival of mouse thymocytes/maintains cell growth (49)                                                                                                                                                                                             | 208.370967                                                                                                                                                                                                 | -3.100144  |                 |                                                                              |                                                                                                       |                     |          |          |  |
| ENSG00000171980                                    |                      | C3AR1                                                                                                                              | activation by C3a enhances naive CD4+ T-cell activation, survival and proliferation via PI3K/Akt (50)                                                                                                                                                                         | 200.019164                                                                                                                                                                                                 | -2.171075  |                 |                                                                              |                                                                                                       |                     |          |          |  |
| ENSG00000101752                                    |                      | MEI1                                                                                                                               | E3 ubiquitin ligase, antagonizing anti-apoptotic effects of DAPK1 to promote TNF-induced apoptosis (51)                                                                                                                                                                       | 7311.88339                                                                                                                                                                                                 | -1.07792   |                 |                                                                              |                                                                                                       |                     |          |          |  |
| ENSG00000163568                                    |                      | AIM2                                                                                                                               | sensor of cytoplasmic DNA activating inflammasome and cell death (52)                                                                                                                                                                                                         | 539.820633                                                                                                                                                                                                 | -1.805941  |                 |                                                                              |                                                                                                       |                     |          |          |  |
| <b>T-CELL ACTIVATION</b>                           |                      | ENSG00000128322                                                                                                                    | IGLL1                                                                                                                                                                                                                                                                         | downregulated within 48 - 96 h after T-cell activation (53)                                                                                                                                                | 28.8096993 | -3.188403       |                                                                              |                                                                                                       |                     |          |          |  |
|                                                    |                      | ENSG00000114728                                                                                                                    | AC10RB2                                                                                                                                                                                                                                                                       | downregulated upon activation in naive T-cells (54)                                                                                                                                                        | 893.595947 | -1.83528        |                                                                              |                                                                                                       |                     |          |          |  |
|                                                    |                      | ENSG00000183386                                                                                                                    | PMOCh                                                                                                                                                                                                                                                                         | expressed activation dependently in $T_{H1}$ , but not $T_{H2}$ cells (55), upregulated in induced Treg (56)                                                                                               | 520.59482  | -1.970519       |                                                                              |                                                                                                       |                     |          |          |  |
|                                                    |                      | ENSG00000139946                                                                                                                    | PEL12                                                                                                                                                                                                                                                                         | cooperates with Bcl-10 to activate NFkB in mice; can activate MAPK and AP-1/IEK-1 in humans (57)                                                                                                           | 2995.12322 | -3.12598        |                                                                              |                                                                                                       |                     |          |          |  |
|                                                    | ENSG00000134480      | IL6RA                                                                                                                              | CD25, sign for terminal differentiation in chronic viral infection (58)                                                                                                                                                                                                       | 620.12175                                                                                                                                                                                                  | -2.47526   |                 |                                                                              |                                                                                                       |                     |          |          |  |
|                                                    | ENSG00000105946      | EBI3                                                                                                                               | part of IL-27 and IL-35, expressed in CD4/CD8 T-cells upon activation with phytohemagglutinin and IL-27 (59)                                                                                                                                                                  | -4.278035                                                                                                                                                                                                  | 7.865508   |                 |                                                                              |                                                                                                       |                     |          |          |  |
|                                                    | ENSG00000118283      | KLIF7                                                                                                                              | upregulated in activated CD8+ T-cells (60)                                                                                                                                                                                                                                    | -2.279037                                                                                                                                                                                                  | 1.10E-08   |                 |                                                                              |                                                                                                       |                     |          |          |  |
|                                                    | ENSG00000147408      | CSGALNACT1                                                                                                                         | associated with EAE (61)                                                                                                                                                                                                                                                      | -2.046745                                                                                                                                                                                                  | 8.2E-07    |                 |                                                                              |                                                                                                       |                     |          |          |  |
|                                                    | ENSG00000104427      | ZGN2A1C                                                                                                                            | variant increases susceptibility to MS (62)                                                                                                                                                                                                                                   | -2.444141                                                                                                                                                                                                  | 9.38E-07   |                 |                                                                              |                                                                                                       |                     |          |          |  |
|                                                    | ENSG00000171980      | CSMR1                                                                                                                              | activation by C3a enhances naive CD4+ T-cell activation, survival and proliferation via PI3K/Akt (50)                                                                                                                                                                         | 2.171075                                                                                                                                                                                                   | 5.84E-08   |                 |                                                                              |                                                                                                       |                     |          |          |  |
|                                                    | ENSG00000168811      | IL12A                                                                                                                              | required for development of EAE (63), upregulates IL12R $\rightarrow$ signaling induces T-bet (64)                                                                                                                                                                            | -2.749978                                                                                                                                                                                                  | 1.78E-05   |                 |                                                                              |                                                                                                       |                     |          |          |  |
|                                                    | ENSG00000151748      | SAV1                                                                                                                               | part of Hippo signaling (induces a rather inflammatory T-cell phenotype (65))                                                                                                                                                                                                 | -1.437997                                                                                                                                                                                                  | 2.07E-05   |                 |                                                                              |                                                                                                       |                     |          |          |  |
|                                                    | ENSG00000214711      | CAPN14                                                                                                                             | calpain, can generate constitutively active calcineurin (66)                                                                                                                                                                                                                  | -2.500567                                                                                                                                                                                                  | 3.48E-05   |                 |                                                                              |                                                                                                       |                     |          |          |  |
|                                                    | ENSG00000174136      | RGMB                                                                                                                               | ligand for PD-L2, not increased upon T-cell activation and absent in naive mice, sets down the threshold for activation and supports T-cell expansion (67)                                                                                                                    | -2.820545                                                                                                                                                                                                  | 0.001115   |                 |                                                                              |                                                                                                       |                     |          |          |  |
|                                                    | ENSG00000127883      | TNFRSF19                                                                                                                           | increases proliferation and NFkB signaling (68)                                                                                                                                                                                                                               | -2.807645                                                                                                                                                                                                  | 0.000155   |                 |                                                                              |                                                                                                       |                     |          |          |  |
|                                                    | ENSG00000111252      | SH2B3                                                                                                                              | LNK, involved in TCR signaling via PI3K/PLC $\gamma$ /Ras (69)                                                                                                                                                                                                                | 1.242567                                                                                                                                                                                                   | 0.000290   |                 |                                                                              |                                                                                                       |                     |          |          |  |
|                                                    | ENSG00000188822      | CMP2                                                                                                                               | carnitine/inositol receptor 2, inhibits inflammatory cytokines/proliferation of T-cells (70)                                                                                                                                                                                  | 264.685093                                                                                                                                                                                                 | 2.458243   |                 |                                                                              |                                                                                                       |                     |          |          |  |
|                                                    | ENSG00000133089      | TMCC2                                                                                                                              | upregulated in the absence of IL-6 which is downstream of TCR signaling (71)                                                                                                                                                                                                  | 130.965562                                                                                                                                                                                                 | -1.640783  |                 |                                                                              |                                                                                                       |                     |          |          |  |
|                                                    | ENSG00000154127      | UBASH3B                                                                                                                            | negatively regulates TCR signaling (72)                                                                                                                                                                                                                                       | 880.821715                                                                                                                                                                                                 | 1.94863    |                 |                                                                              |                                                                                                       |                     |          |          |  |
|                                                    | ENSG00000107679      | PLEKHA11                                                                                                                           | reduces activation of PI3K/Akt and STATs via PTPN11 (73)                                                                                                                                                                                                                      | 1089.23164                                                                                                                                                                                                 | 1.942193   |                 |                                                                              |                                                                                                       |                     |          |          |  |
| ENSG00000157075                                    | TRB2                 | negative regulator of mitogen-activated protein kinases, differential expression in peripheral CD4+ (higher) and CD8+ T-cells (74) | 2082.21767                                                                                                                                                                                                                                                                    | 1.612003                                                                                                                                                                                                   |            |                 |                                                                              |                                                                                                       |                     |          |          |  |
| <b>TRANSPORTERS / ION CHANNELS / GAP_JUNCTIONS</b> | ENSG00000052098      | SLC22A17                                                                                                                           | iron transporter, down-regulated in Tau compared to Tau (75)                                                                                                                                                                                                                  | 52.2089151                                                                                                                                                                                                 | -4.821621  |                 |                                                                              |                                                                                                       |                     |          |          |  |
|                                                    | ENSG00000173150      | PANX2                                                                                                                              | Structural component of the gap junctions and the hemichannels                                                                                                                                                                                                                | 38.9683951                                                                                                                                                                                                 | -4.153572  |                 |                                                                              |                                                                                                       |                     |          |          |  |
|                                                    | ENSG00000138052      | SLC14A2                                                                                                                            | Transport of glucose and other sugars, bile salts and organic acids, metal ions and amine compounds, induced by TNF (76)                                                                                                                                                      | 458.502097                                                                                                                                                                                                 | -2.894748  |                 |                                                                              |                                                                                                       |                     |          |          |  |
|                                                    | ENSG00000069923      | SLC9A7                                                                                                                             | sodium and potassium+ proton antiporter, lower expression in non-human primate EboA survivors than in non-survivors (77)                                                                                                                                                      | 1991.43457                                                                                                                                                                                                 | -1.812689  |                 |                                                                              |                                                                                                       |                     |          |          |  |
|                                                    | ENSG00000144935      | TRPC1                                                                                                                              | needed for intracellular calcium increase by TH1 in T-cells via DAG (78)                                                                                                                                                                                                      | 328.047316                                                                                                                                                                                                 | -2.158811  |                 |                                                                              |                                                                                                       |                     |          |          |  |
|                                                    | ENSG00000105674      | GJB2                                                                                                                               | connexin 26, part of gap junctions                                                                                                                                                                                                                                            | 38.2806533                                                                                                                                                                                                 | -3.677982  |                 |                                                                              |                                                                                                       |                     |          |          |  |
|                                                    | ENSG00000121742      | GLBE                                                                                                                               | connexin, part of gap junction                                                                                                                                                                                                                                                | 44.956475                                                                                                                                                                                                  | -3.42867   |                 |                                                                              |                                                                                                       |                     |          |          |  |
|                                                    | ENSG00000075673      | ATP12A                                                                                                                             | H $\text{K}^+$ -ATPase                                                                                                                                                                                                                                                        | 231.196155                                                                                                                                                                                                 | -3.834569  |                 |                                                                              |                                                                                                       |                     |          |          |  |
|                                                    | ENSG00000180502      | SLC24A3                                                                                                                            | Potassium-dependent sodium/calcium exchanger                                                                                                                                                                                                                                  | 49.8368198                                                                                                                                                                                                 | 3.227841   |                 |                                                                              |                                                                                                       |                     |          |          |  |
|                                                    | ENSG00000122986      | HVCN1                                                                                                                              | voltage-gated proton channel activity, downregulated in CD56+ T-cells (able to kill CMV-infected cells), associated with metabolism (79)                                                                                                                                      | 469.805016                                                                                                                                                                                                 | 0.929571   |                 |                                                                              |                                                                                                       |                     |          |          |  |
|                                                    | ENSG00000135750      | KCNK1                                                                                                                              | contributes to passive transmembrane potassium transport                                                                                                                                                                                                                      | 36.3723901                                                                                                                                                                                                 | -2.73024   |                 |                                                                              |                                                                                                       |                     |          |          |  |
|                                                    | ENSG00000160190      | SLC37A1                                                                                                                            | PI-linked GSP antiporter (80)                                                                                                                                                                                                                                                 | 8028.32349                                                                                                                                                                                                 | 1.509443   |                 |                                                                              |                                                                                                       |                     |          |          |  |
|                                                    | ENSG00000182747      | SLC35D3                                                                                                                            | Solute Carrier                                                                                                                                                                                                                                                                | 12.9025324                                                                                                                                                                                                 | -2.966805  |                 |                                                                              |                                                                                                       |                     |          |          |  |
|                                                    | ENSG00000091137      | SLC26A4                                                                                                                            | transmembrane transporter                                                                                                                                                                                                                                                     | 125.84343                                                                                                                                                                                                  | -2.113035  |                 |                                                                              |                                                                                                       |                     |          |          |  |
|                                                    | ENSG00000186187      | ZNRF1                                                                                                                              | regulates the sodium/potassium pump (Na $^+$ /K $^+$ -ATPase) with ZNRF2 (81), high expression in conventional T-cells in the lymph node, but not skin or fat (82)                                                                                                            | 734.851294                                                                                                                                                                                                 | -1.470285  |                 |                                                                              |                                                                                                       |                     |          |          |  |
|                                                    | ENSG00000165449      | SLC16A9                                                                                                                            | Proton-linked monocarboxylate transmembrane transporter                                                                                                                                                                                                                       | 14.7888121                                                                                                                                                                                                 | -2.481201  |                 |                                                                              |                                                                                                       |                     |          |          |  |
|                                                    | <b>PROLIFERATION</b> | ENSG000000196507                                                                                                                   | TCEAL3                                                                                                                                                                                                                                                                        | transcription elongation factor                                                                                                                                                                            | 98.9871397 | -2.19082        |                                                                              |                                                                                                       |                     |          |          |  |
|                                                    |                      | ENSG00000175155                                                                                                                    | YPEL2                                                                                                                                                                                                                                                                         | part of the mitotic apparatus required for cell division (83)                                                                                                                                              | 1404.32006 | -1.19115        |                                                                              |                                                                                                       |                     |          |          |  |
|                                                    |                      | ENSG00000048886                                                                                                                    | CH3L2                                                                                                                                                                                                                                                                         | activation of ERK1/2 phosphorylation by CH3L2 inhibits cell mitogenesis and proliferation (84)                                                                                                             | 183.237131 | 1.18076         |                                                                              |                                                                                                       |                     |          |          |  |
|                                                    |                      | ENSG00000102302                                                                                                                    | NME4                                                                                                                                                                                                                                                                          | involved in Pyrimidine Metabolism and Metabolism                                                                                                                                                           | 325.68844  | -1.87288        |                                                                              |                                                                                                       |                     |          |          |  |
| ENSG00000174136                                    |                      | RGMB                                                                                                                               | involved in T cell activation and supports T-cell expansion (67)                                                                                                                                                                                                              | 181.82579                                                                                                                                                                                                  | -2.82547   |                 |                                                                              |                                                                                                       |                     |          |          |  |
| ENSG00000127863                                    |                      | TNFRSF19                                                                                                                           | cell cycle regulated NADPH-dependent dicarboxylate reductase enzyme (85)                                                                                                                                                                                                      | 52.286621                                                                                                                                                                                                  | -2.60785   |                 |                                                                              |                                                                                                       |                     |          |          |  |
| ENSG00000106887                                    |                      | DHR22                                                                                                                              | ligand for UDP-glucose, activation inhibits murine T cell proliferation (86)                                                                                                                                                                                                  | 68.738987                                                                                                                                                                                                  | -2.18412   |                 |                                                                              |                                                                                                       |                     |          |          |  |
| ENSG00000174844                                    |                      | P2RY14                                                                                                                             | ligand for UDP-glucose, activation inhibits murine T cell proliferation (86)                                                                                                                                                                                                  | 28.1452621                                                                                                                                                                                                 | -2.54096   |                 |                                                                              |                                                                                                       |                     |          |          |  |
| ENSG00000164362                                    |                      | TERT                                                                                                                               | Telomerase Reverse Transcriptase, overexpression extends proliferative potential of human T-cells (                                                                                                                                                                           |                                                                                                                                                                                                            |            |                 |                                                                              |                                                                                                       |                     |          |          |  |



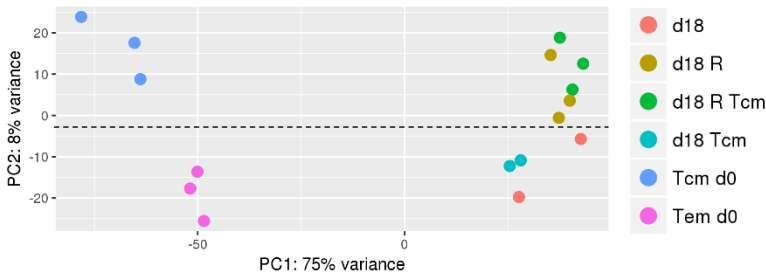

**Figure S2:** Rapamycin-treated cells are closer to *ex vivo* sorted  $T_{CM}$  and non-treated cultures resemble  $T_{EM}$  in dimension PC2.

Principle component (PC) analysis of RNA sequencing data of  $T_{CM}$  and  $T_{EM}$  sorted on d0 out of PBMCs derived from buffy coats of  $n = 3$  HDs and untreated as well as Rapa-TCPs (R) and  $T_{CM}$ -like cells sorted on d18 of culture from the indicated TCP derived from the same  $n = 3$  buffy coat donors. Lacking data points of d18 and d18  $T_{CM}$  occurred due to failure at the quality control level.

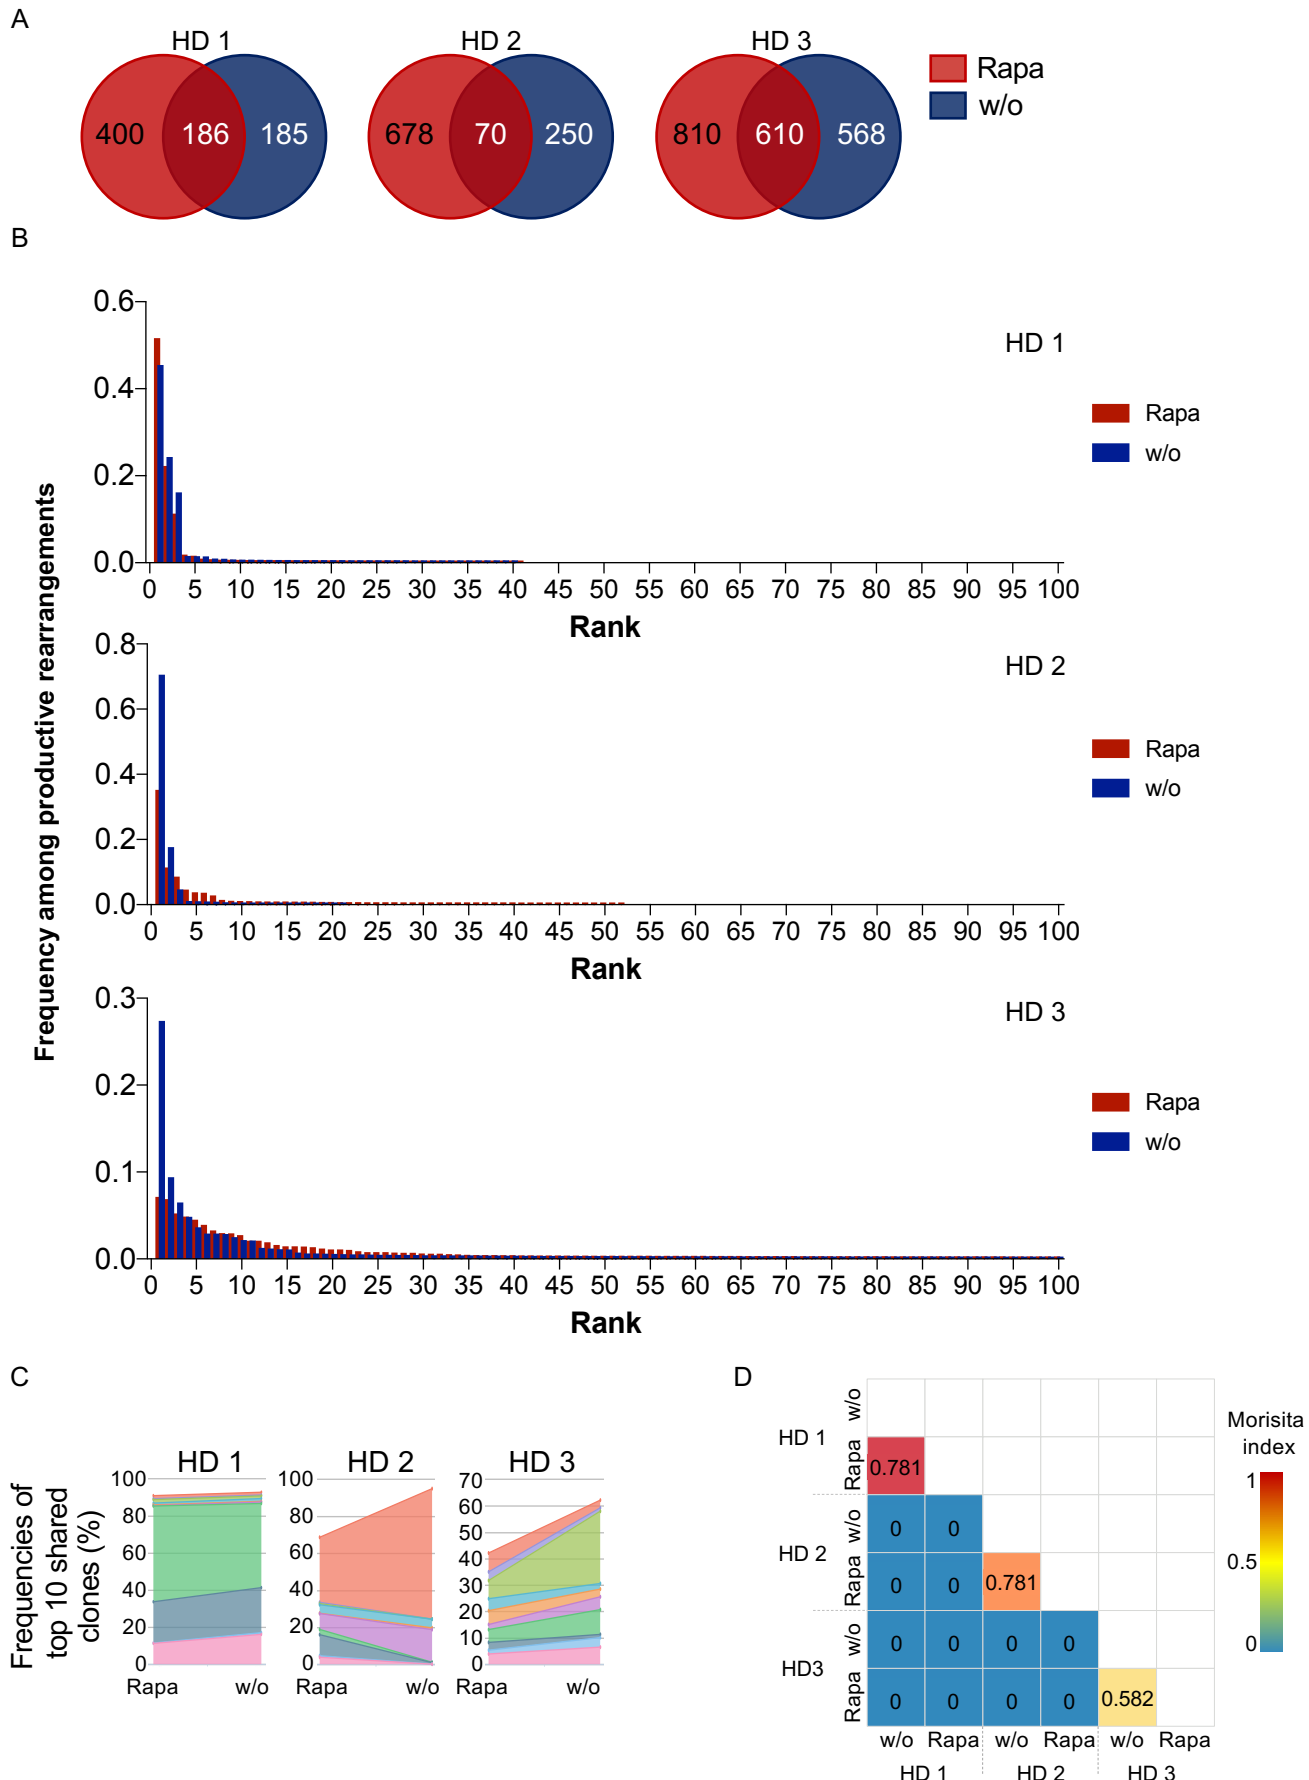

**Figure S3:** Distribution of T-cell clones among Rapa- and untreated TCPs and different donors.

**A:** Venn diagrams of all clones of Rapa- (red) and untreated TCPs (blue) of 3 HDs demonstrating individual and shared clones of each sample. **B:** Frequencies among productive rearrangements of the top100 clones of Rapa- (red) and untreated TCPs (blue) of 3 HDs. **C:** Stacked view of individual frequencies of the top 10 most represented shared clones in Rapa- and untreated TCPs (w/o) of 3 HDs. Shared clones were ranked based upon the maximum frequency achieved in either Rapa- or untreated TCPs. **D:** Morisita index matrix showing sample overlap between all samples, which is based on the presence of unique clones, individual frequencies of clones and the probability of a common origin of two samples. All data were calculated in ImmunoSEQ-Analyzer 3.0 based on TCR $\beta$  sequencing data.

**Table S2: Patient details.**

Pred. = Prednisolone; M-pred. = Methyl-prednisolone; Tac. = Tacrolimus; MMF = Mycophenolate mofetil; MPS = Mycophenolate sodium; CSA = Cyclosporine A; VGCV = Valganciclovir; ACV = Acyclovir; conc. = concentration; imcomp. = incompatible

| No.                                  | Patients with so far no recorded CMV viremia |                                             |                           |                                          |                                           |                                              |                                           |                                                                        |                                                                                                                                  | Patients with recent CMV viremia                                              |                                                                                                   |                                            |                                | Patients with history of CMV viremia                |                                              |                                            |                             |                                                    |                                  |
|--------------------------------------|----------------------------------------------|---------------------------------------------|---------------------------|------------------------------------------|-------------------------------------------|----------------------------------------------|-------------------------------------------|------------------------------------------------------------------------|----------------------------------------------------------------------------------------------------------------------------------|-------------------------------------------------------------------------------|---------------------------------------------------------------------------------------------------|--------------------------------------------|--------------------------------|-----------------------------------------------------|----------------------------------------------|--------------------------------------------|-----------------------------|----------------------------------------------------|----------------------------------|
|                                      | 1                                            | 2                                           | 3                         | 4                                        | 5                                         | 6                                            | 7                                         | 8                                                                      | 9                                                                                                                                | 10                                                                            | 11                                                                                                | 12                                         | 13                             | 14                                                  | 15                                           | 16                                         | 17                          | 18                                                 | 19                               |
| Age                                  | 58                                           | 45                                          | 42                        | 53                                       | 29                                        | 45                                           | 51                                        | 44                                                                     | 78                                                                                                                               | 56                                                                            | 52                                                                                                | 46                                         | 63                             | 70                                                  | 66                                           | 67                                         | 34                          | 60                                                 |                                  |
| Gender                               | M                                            | F                                           | F                         | F                                        | M                                         | M                                            | F                                         | M                                                                      | M                                                                                                                                | M                                                                             | M                                                                                                 | M                                          | M                              | M                                                   | F                                            | F                                          | F                           | F                                                  |                                  |
| Time from KTx [d]                    | 264                                          | 294                                         | 161                       | 19                                       | 21                                        | 21                                           | 13                                        | 21                                                                     | 694                                                                                                                              | 27                                                                            | 2399                                                                                              | 28                                         | 1809                           | 296                                                 | 380                                          | 563                                        | 665                         | 7418                                               |                                  |
| Time from last CMV viremia [d]       | -                                            | -                                           | -                         | -                                        | -                                         | -                                            | -                                         | -                                                                      | 0                                                                                                                                | 0                                                                             | 13                                                                                                | 9                                          | 1728                           | 119                                                 | 140                                          | 112                                        | 645                         | 40                                                 |                                  |
| Tac. blood conc. [ng/ml]             | 8.5                                          | 6.4                                         | 7.2                       | 11.3                                     | 10                                        | 8.35                                         | 5.2                                       | 9.7                                                                    | 6.5                                                                                                                              | 11.5                                                                          |                                                                                                   |                                            | 5.9                            | 5.5                                                 | 8.5                                          | 11.3                                       | 4.1                         | 4                                                  |                                  |
| Immunosuppression at d0              | Tac (1 mg)<br>MMF (1.5 g)                    | M-pred (4 mg)<br>Tac (10.5 mg)<br>MMF (2 g) | Tac (3 mg)<br>MMF (1.5 g) | Pred (20 mg)<br>Tac (15 mg)<br>MMF (2 g) | M-pred (4 mg)<br>Tac (18 mg)<br>MMF (2 g) | M-pred (4 mg)<br>Tac (6 mg)<br>MMF (2 g)     | M-pred (24 mg)<br>Tac (8 mg)<br>MMF (2 g) | M-pred (4 mg)<br>Tac (16 mg)<br>MMF (2 g)                              | M-pred (4 mg)<br>Tac (3 mg)<br>MMF (1.5 g)                                                                                       | M-pred (4 mg)<br>Tac (10 mg)<br>MMF (1.5 g)                                   | M-pred (4 mg)<br>CSA (130 mg)<br>MMF (2 g)                                                        | M-pred (4 mg)<br>CSA (250 mg)<br>MPS (2 g) | M-pred (4 mg)<br>Tac (4.5 mg)  | M-pred (4 mg)<br>Tac (7 mg)<br>MMF (500 mg)         | M-pred (4 mg)<br>Tac (3.5 mg)<br>MMF (1.5 g) | M-pred (4 mg)<br>Tac (2.5 mg)<br>MMF (2 g) | M-pred (4 mg)<br>Tac (7 mg) | Pred (5 mg)<br>Tac (4.5 mg)<br>MPS (108 g)         |                                  |
| Rejection [from d0]                  | scale cellular rejection (<245)              | no                                          | no                        | no                                       | no                                        | suspected scale (ATG-17 to -19)              | no                                        | no                                                                     |                                                                                                                                  |                                                                               |                                                                                                   |                                            |                                |                                                     |                                              |                                            |                             |                                                    |                                  |
| Antiviral therapy [from d0]          | none                                         | none                                        | none                      | none                                     | none                                      | none                                         | none                                      | none                                                                   | VGCV 900 mg<br>(488 to 420);<br>450 mg (-283 to -356);<br>225 mg (-488 to -596);<br>+356 to -374)                                | VGCV 450 mg<br>(19.01.2017 - 14.02.2017);<br>900 mg (23.11.2016 - 19.01.2017) | VGCV 450 mg<br>(2451 to 2423)                                                                     | VGCV 900 mg<br>(7 to +5)                   | none                           | VGCV 450 mg<br>(-1267 to -1218);<br>-1372 to -1311) | VGCV 225 mg<br>(-355 to -327)                | none                                       | none                        | ACV 200 mg<br>(since -753)                         |                                  |
| Other detected CMV/viremia [from d0] | none                                         | none                                        | none                      | none                                     | none                                      | +54                                          | none                                      | +112; +7                                                               | +400; -283;<br>+261; +168;<br>+119; +78; +45;<br>-35; +6; -125;<br>-292; -312;<br>-348; -391;<br>-412; -420;<br>-475; -491; -486 | +266; -7; -11;<br>-14; 21                                                     | +488; +272;<br>+97; -13; -22;<br>-78; -287; -637;<br>-813; -978;<br>-1182; -1569;<br>-2470; -2489 | -18; -25                                   | none                           | +325; +252;<br>-524; -708;<br>-888; -1255;<br>-1269 | +328; -233                                   | 487; -528; -538                            | none                        | +297; +129;<br>-207; -613;<br>-641; -972;<br>-2324 |                                  |
| Lymphocyte count [1/dl]              | 1.04                                         | 1.49                                        | 1.48                      | 2.34                                     | 1.23                                      | 0.09                                         | 2.34                                      | 2.32                                                                   | 0.28                                                                                                                             | 0.47                                                                          | 0.71                                                                                              | 1.21                                       | 1.6                            | 0.98                                                | 0.88                                         | 1.22                                       | 1.26                        | -                                                  |                                  |
| Donor CMV before KTx                 | CMV-; living                                 | CMV+; living                                | CMV-; living              | CMV+; living                             | CMV+; living                              | CMV-; living                                 | CMV+; living                              | CMV+; living                                                           | CMV+; decreased                                                                                                                  | CMV+; living                                                                  | CMV+; living                                                                                      | CMV+; living                               | CMV+; decreased                | CMV+; decreased                                     | CMV+; decreased                              | CMV+; decreased                            | CMV+; living                | CMV+; decreased                                    |                                  |
| Other                                |                                              |                                             |                           |                                          |                                           | ABO incomp. donation, delayed graft function |                                           |                                                                        |                                                                                                                                  |                                                                               |                                                                                                   |                                            |                                |                                                     |                                              |                                            |                             | missed abortion (-1)                               | renal carcinoma (diagnosed +289) |
| Underlying disease                   | IgA nephritis                                | hypertensive nephropathy                    | polycystic kidney disease | IgA nephritis                            | IgA nephritis                             | seronegative Lupus erythematosus             | polycystic kidney disease                 | left nephrectomy after relapsed pyelonephritis obstructive nephropathy | hyperertensive nephropathy                                                                                                       | IgA nephritis                                                                 | unilateral renal agenesis and obstructive nephropathy                                             | Renal hypertensive angiopathy              | Pauci-immun glomerulonephritis | unclear                                             | Diabetic nephropathy                         | hypertensive nephropathy                   | IgA nephropathy             | Diabetic nephropathy                               |                                  |

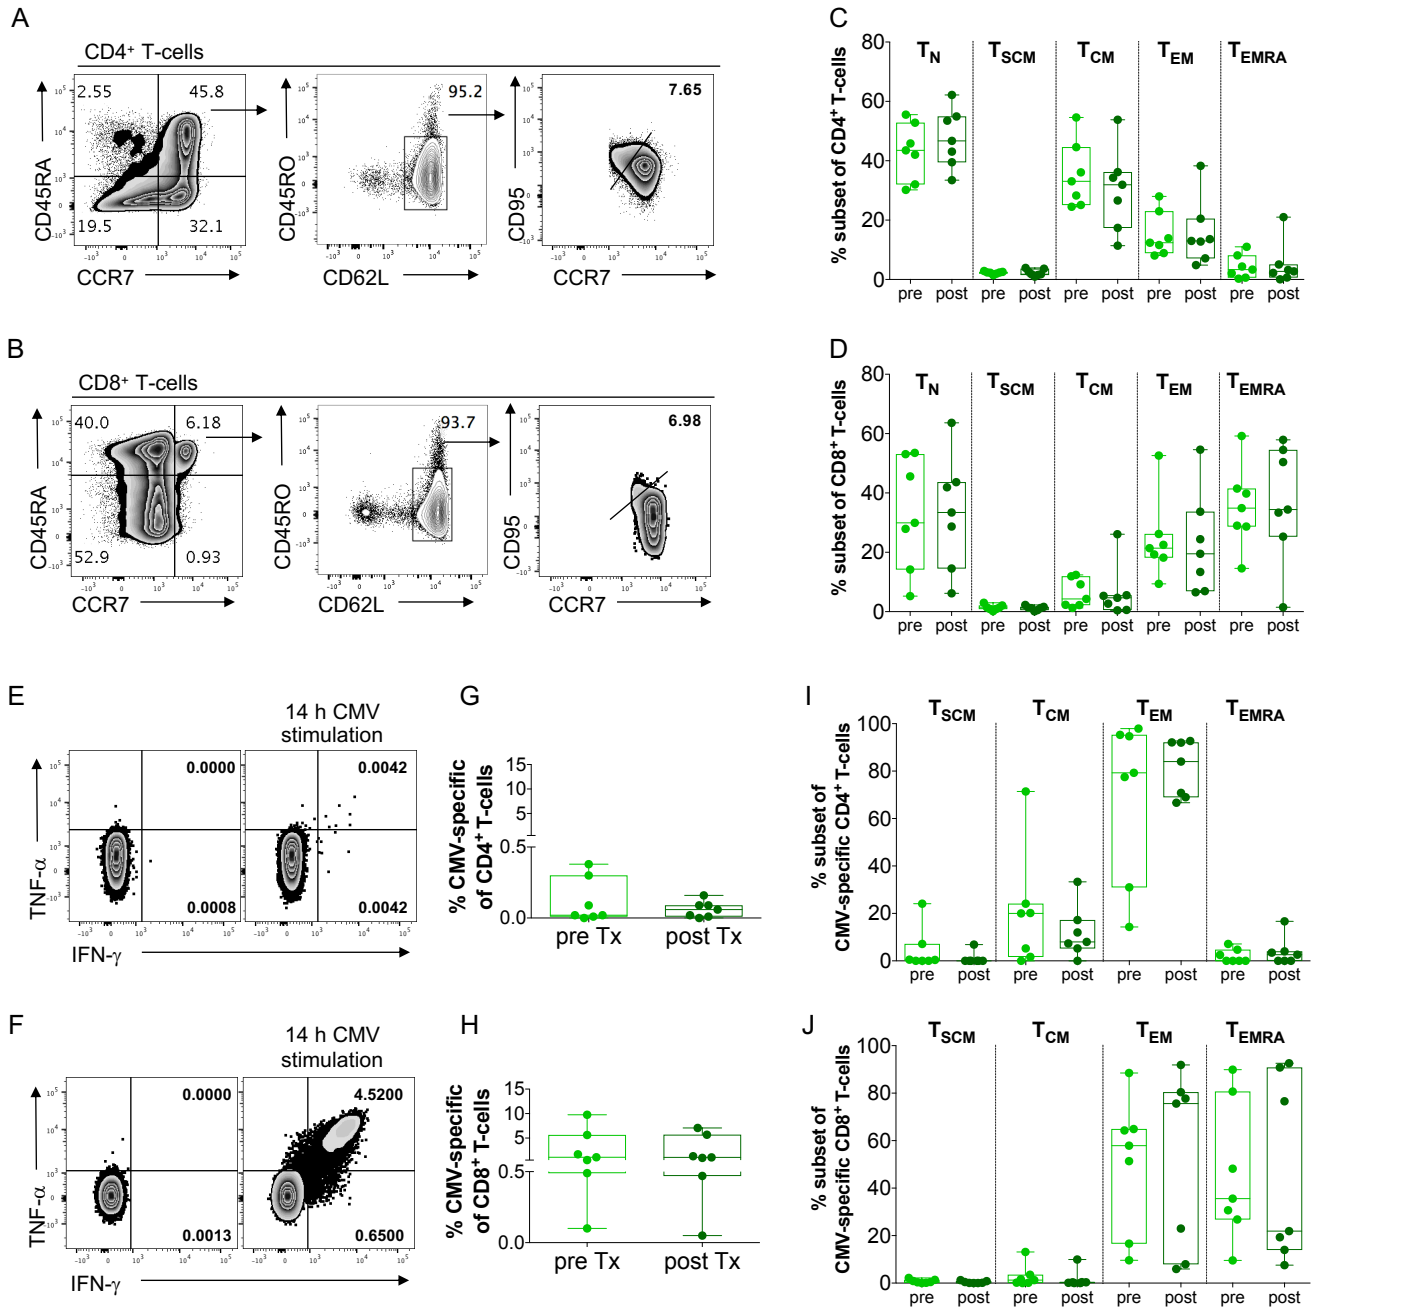

**Figure S4:** CMV-specific *ex vivo* response shifts to T<sub>EM</sub> on the expense of T<sub>CM</sub> within a few weeks after transplantation while the global subset composition remains stable.

N = 7 paired samples from the same patients before (pre; pastel green) and a few weeks after KTx (post; dark green). Gated on lymphocytes (FSC-A vs. SSC-A), single cells (FSC-H vs. FSC-A), living T-cells (CD3 vs. life/dead-discriminating dye) and as indicated on CD4<sup>+</sup> or CD8<sup>+</sup> T-cells, respectively. Gating strategy for discrimination of T-cell memory subsets for CD4<sup>+</sup> (A) and CD8<sup>+</sup> (B) subsets: T<sub>N</sub>: CD45RA<sup>+</sup> CCR7<sup>+</sup> CD95<sup>-</sup>; T<sub>SCM</sub>: CD45RA<sup>+</sup> CCR7<sup>+</sup> CD45RO<sup>-</sup> CD62L<sup>+</sup> CD95<sup>+</sup>; T<sub>CM</sub>: CD45RA<sup>-</sup> CCR7<sup>+</sup>; T<sub>EM</sub>: CD45RA<sup>-</sup> CCR7<sup>-</sup>; T<sub>EMRA</sub>: CD45RA<sup>+</sup> CCR7<sup>-</sup>. Global T-cell memory subset distribution of CD4<sup>+</sup> (C) and CD8<sup>+</sup> (D) T-cells from peripheral blood collected *pre-* and *post-Tx*. Subsets gated as shown in A/B. IFN $\gamma$  and TNF $\alpha$  were stained intracellularly after 14 h stimulation of fresh PBMCs with CMV<sub>E-1/pp65</sub> peptide pools and addition of BFA after 1 h. Exemplary dot plots and gating strategy for CD4<sup>+</sup> (E) and CD8<sup>+</sup> (F) T-cells. Summary of CMV-specific CD4<sup>+</sup> (G) and CD8<sup>+</sup> (H) T-cells identified as IFN $\gamma$ <sup>+</sup>TNF $\alpha$ <sup>+</sup> detected *ex vivo* in PBMCs of KTx patients based on the gating strategy shown in E/F. Proportions of subsets among CMV-responsive CD4<sup>+</sup> (I) and CD8<sup>+</sup> T-cells (J) determined by characteristic expression of CCR7, CD45RA and CD95. Gates were applied from gates set for global T-cell subset distribution (A/B).



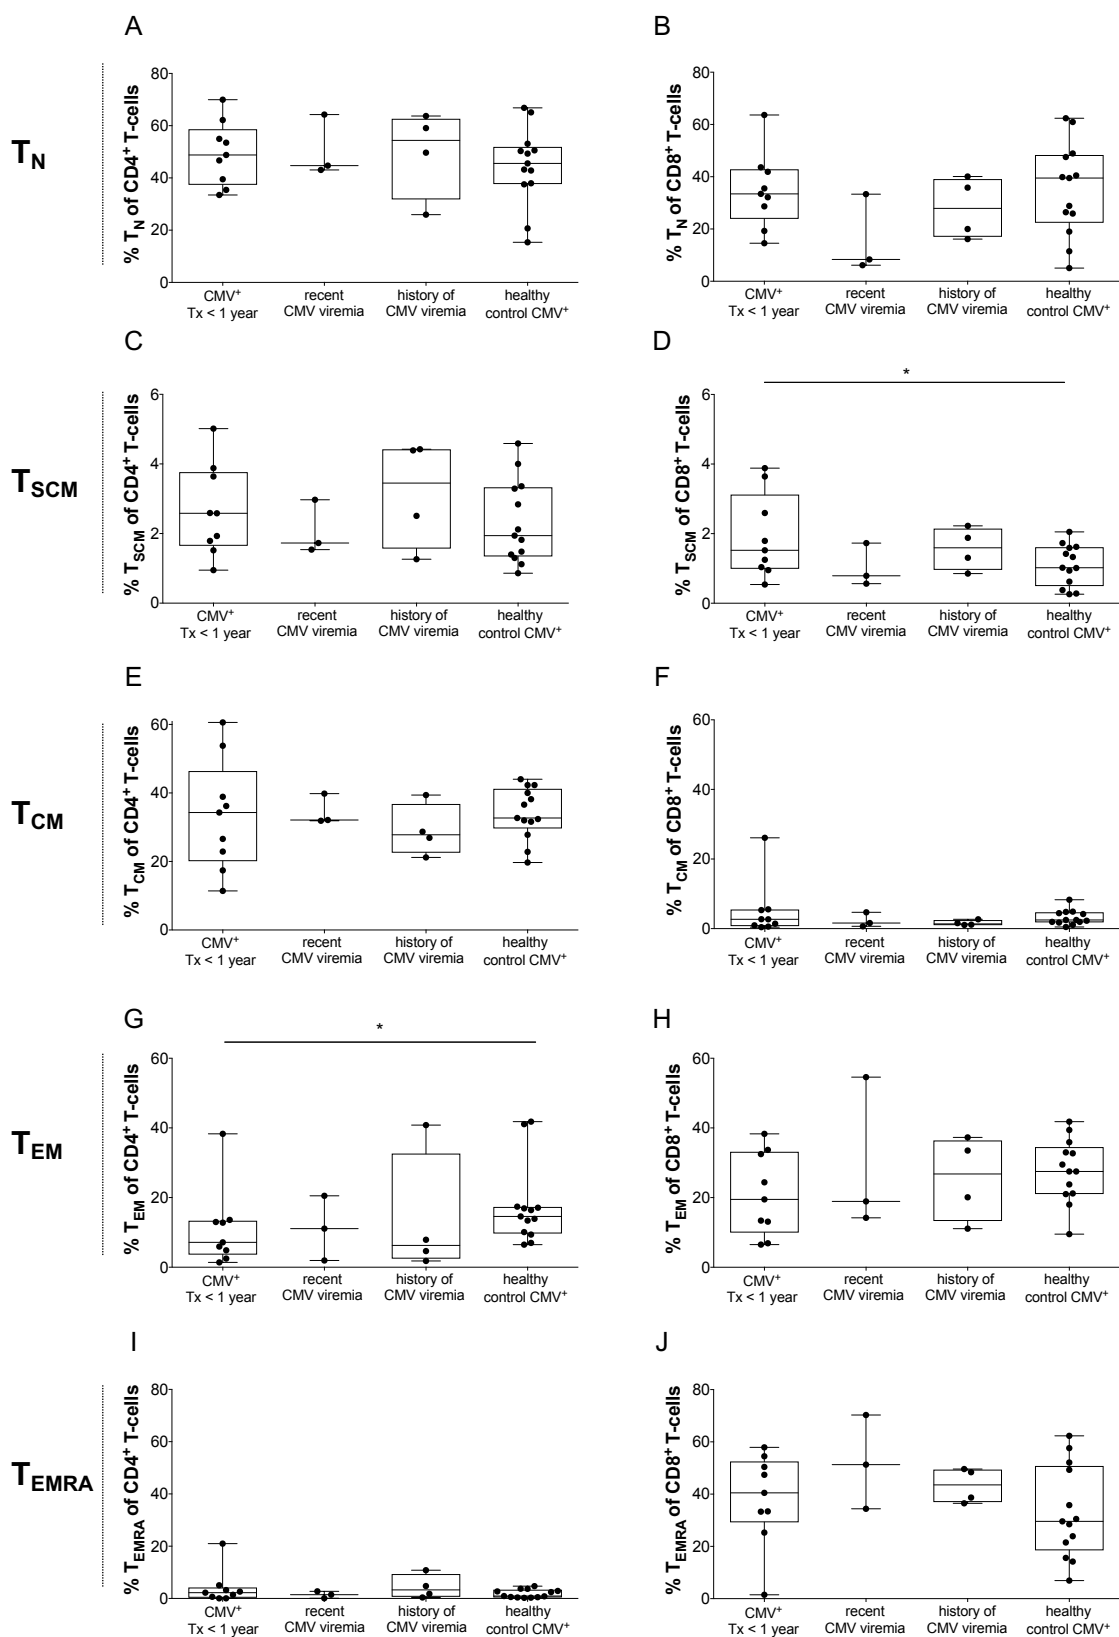

**Figure S5:**  $CD8^+ T_{SCM}$  are globally increased and  $CD4^+ T_{EM}$  globally decreased in the blood of patients without record of CMV viremia compared to the blood of healthy donors.

T-cell subset distribution of  $n = 19$  patients (9 with so far no recorded CMV viremia and 6 with a history of CMV viremia)/13 HDs. Global proportions of different  $CD4^+$  (left panel) and  $CD8^+$  T-cell (right panel) subsets determined by characteristic expression of CCR7, CD45RA, CD62L, CD45RO and CD95.  $N=19$  patients (9 with so far no recorded CMV viremia; 4 with recent CMV viremia and 6 with a history of CMV viremia)/13 HDs. Gating strategy is shown in Fig. S4A/B.  $CD4^+$  (A) and  $CD8^+$  (B)  $CD45RA^+ CCR7^+ CD95^- T_N$ .  $CD4^+$  (C) and  $CD8^+$  (D)  $CD45RA^+ CCR7^+ CD62L^+ CD45RO^- CD95^+ T_{SCM}$ .  $CD4^+$  (E) and  $CD8^+$  (F)  $CD45RA^- CCR7^+ T_{CM}$ .  $CD4^+$  (G) and  $CD8^+$  (H)  $CD45RA^- CCR7^- T_{EM}$ .  $CD4^+$  (I) and  $CD8^+$  (J)  $CD45RA^+ CCR7^- T_{EMRA}$ . All data tested for normal distribution of data points with Kolmogorov-Smirnov test; significance determined with paired t test if normally distributed or Wilcoxon's matched-pairs signed rank test for not normally distributed samples. P-values below 0.05 are indicated by \* and defined to be significant.



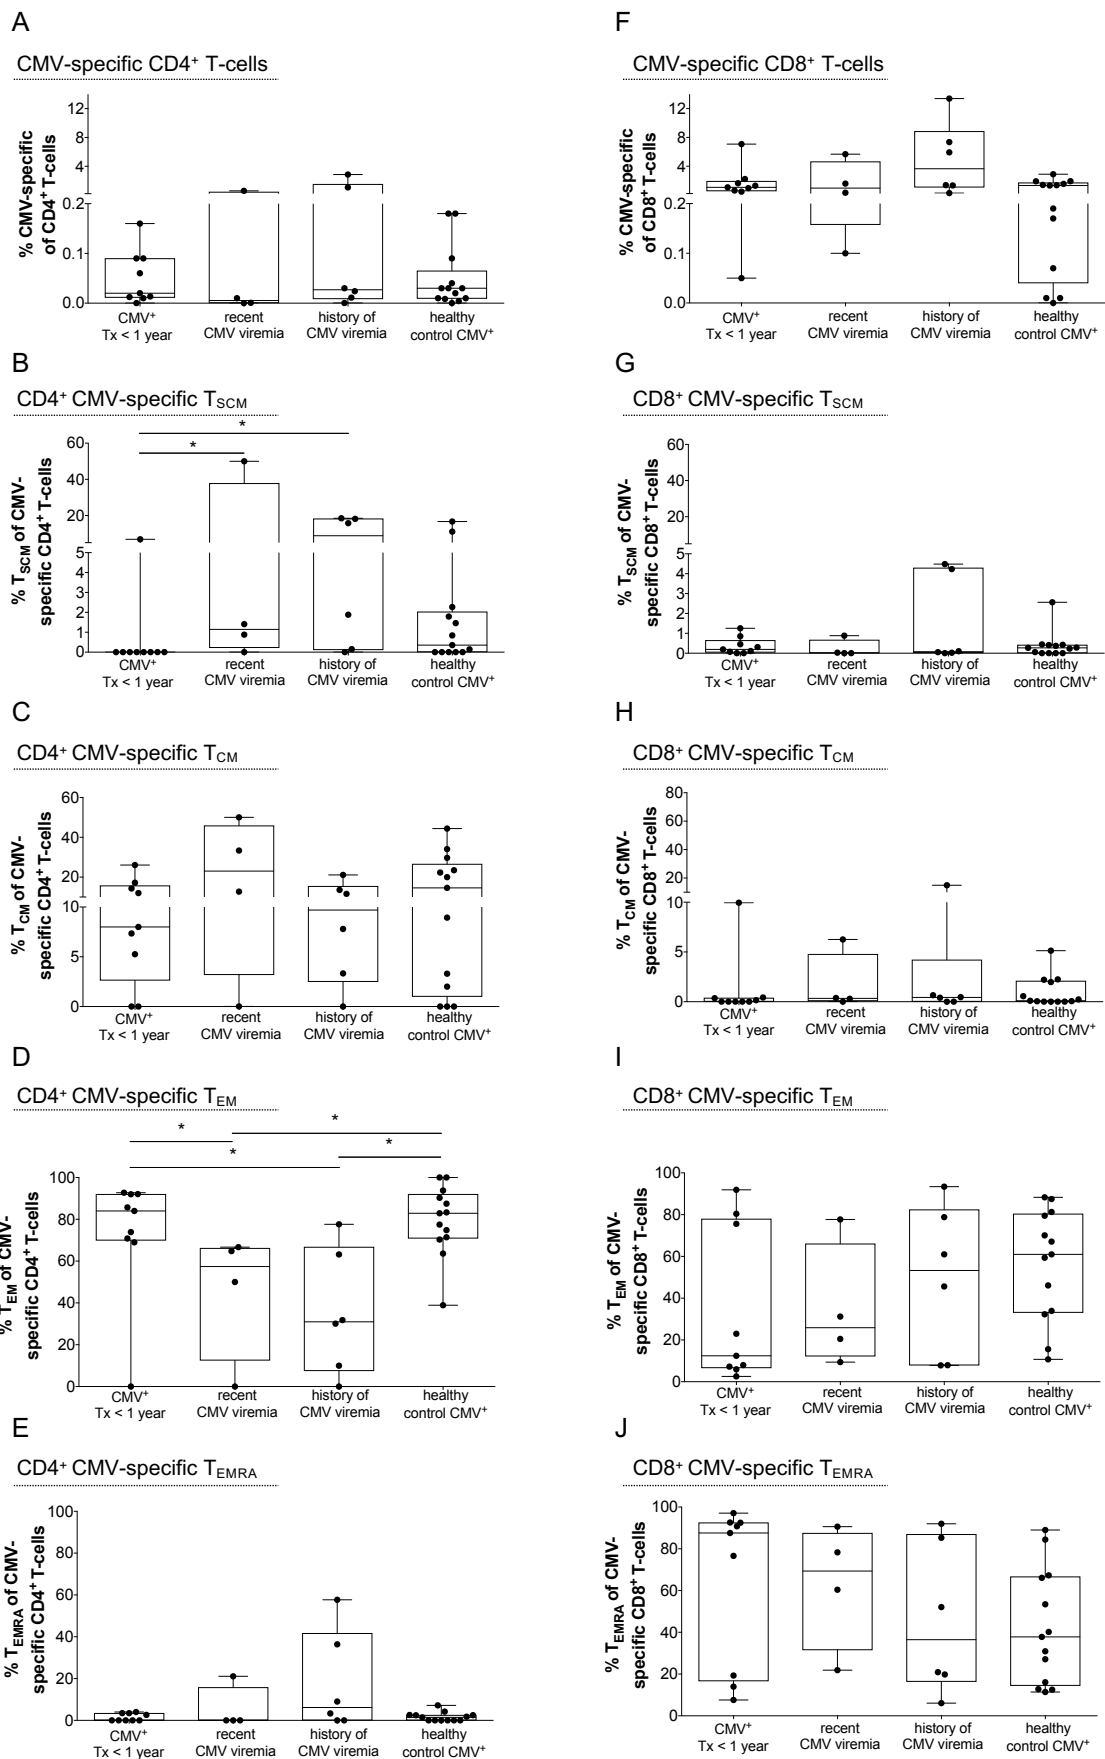

**Figure S6: CD4<sup>+</sup> CMV-specific T<sub>SCM</sub> accumulate upon CMV reactivation and T<sub>EM</sub> diminish after a history of CMV viremia in renal transplant recipients.**

N=19 patients (9 with so far no recorded CMV viremia; 4 with recent CMV viremia and 6 with a history of CMV viremia)/13 healthy controls. Proportions of CMV-responsive among CD4<sup>+</sup> (A) and CD8<sup>+</sup> (F) T-cells detected by double positive intracellular staining for IFN $\gamma$  and TNF $\alpha$  after 14 h stimulation of fresh PBMCs with CMV<sub>IE-1/pp65</sub> peptide pools and addition of BFA after 1 h (see dot plots Fig. 4E-F). T-cell memory subset distribution of CMV-reactive CD4<sup>+</sup> (B-E) and CD8<sup>+</sup> (G-J) T-cells following the gating strategy and subset definitions presented in Fig. S4A/B, applying gates for global subset distribution from Fig.S4. CMV-reactive CD4<sup>+</sup> (B) and CD8<sup>+</sup> (G) CD45RA<sup>+</sup> CCR7<sup>+</sup> CD62L<sup>+</sup> CD45RO<sup>-</sup> CD95<sup>+</sup> T<sub>SCM</sub>. CMV-reactive CD4<sup>+</sup> (C) and CD8<sup>+</sup> (H) CD45RA<sup>-</sup> CCR7<sup>+</sup> T<sub>CM</sub>. CMV-reactive CD4<sup>+</sup> (D) and CD8<sup>+</sup> (I) CD45RA<sup>-</sup> CCR7<sup>-</sup> T<sub>EM</sub>. CMV-reactive CD4<sup>+</sup> (E) and CD8<sup>+</sup> (J) CD45RA<sup>+</sup> CCR7<sup>-</sup> T<sub>EMRA</sub>. All data tested for normal distribution of data points with Kolmogorov-Smirnov test; significance determined with paired t test if normally distributed or Wilcoxon's matched-pairs signed rank test for not normally distributed samples. P-values below 0.05 are indicated by \* and defined to be significant.

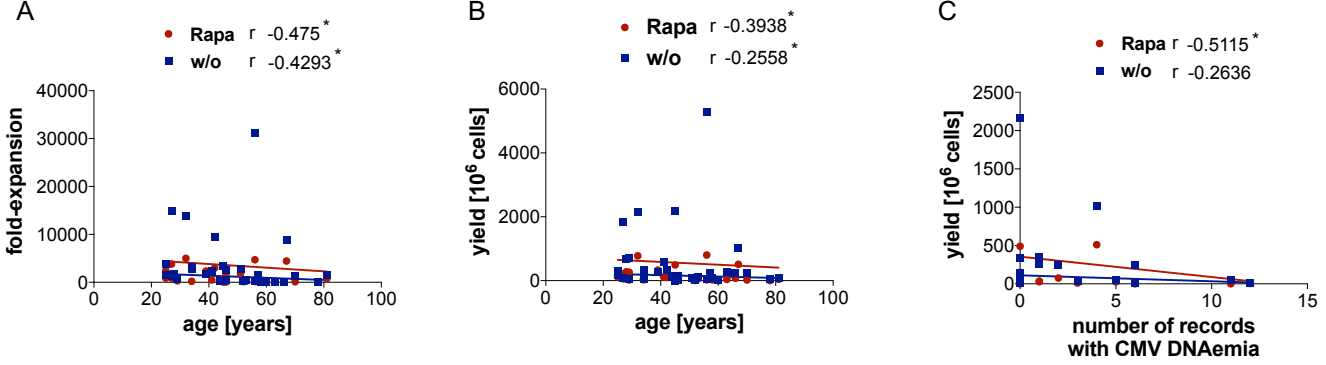

**Figure S7:** Decreased fold-expansion and yield correlate with increasing age and numbers of recorded reactivations.

Correlations of age and fold-expansion (**A**)/yield (**B**) as well as records of reactivations determined by viremia and yield (**C**) in untreated (blue) and Rapa (treated with 20 nM Rapamycin; red)-TCPs of 19 patients and 13 HDs; distributions tested for normality with Kolmogorov-Smirnov test, correlations of normally distributed data calculated with Pearson's correlation coefficient and of not normally distributed data with Spearman's rank correlation.

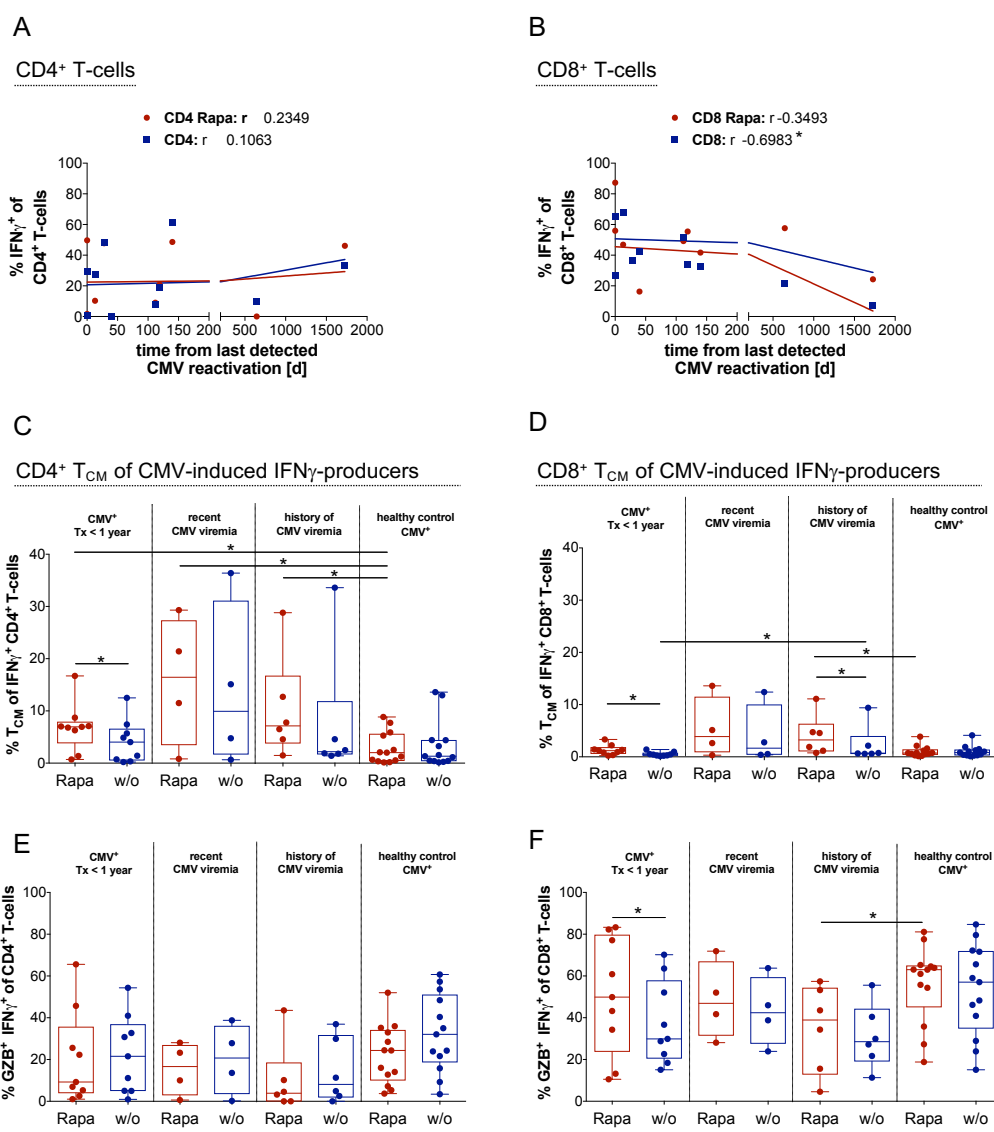

**Figure S8:** The proportion of IFN<sub>γ</sub>-producing CD8<sup>+</sup> T-cells negatively correlates with the time from reactivation in *Rapa*-TCPs, among CMV-stimulated IFN<sub>γ</sub> responders the frequency of T<sub>CM</sub> is increased in TCPs from patients with recorded CMV viremia and a substantial amount of cytotoxic CD4<sup>+</sup> T-cells is abundant in TCPs.

Correlations of proportions of IFN<sub>γ</sub>-producing CD4<sup>+</sup> (A) and CD8<sup>+</sup> (B) T-cells from untreated (w/o, blue) and *Rapa* (red)-TCPs to time from last recorded CMV DNAemia from n = 10 patients (for whom a record of CMV DNAemia was available; Table S2); distributions tested for normality with Kolmogorov-Smirnov test, correlations of normally distributed data calculated with Pearson's correlation coefficient and of not normally distributed data with Spearman's rank correlation. Proportions of CD45RA-CCR7<sup>+</sup> T<sub>CM</sub> among IFN<sub>γ</sub> producing CD4<sup>+</sup> (C) and CD8<sup>+</sup> (D) T-cells. Gates were applied from gates set for global T cell subset distribution (Fig.S4A-B). Proportions of CD4<sup>+</sup> (E) and CD8<sup>+</sup> (F) GZB-IFN<sub>γ</sub>-double-producers detected by intracellular staining after 6 h stimulation with autologous LCLs loaded CMV<sub>IE-1/pp65</sub> peptide pools and addition of BFA after 1 h on d21.

**A****CD4<sup>+</sup> T-cells**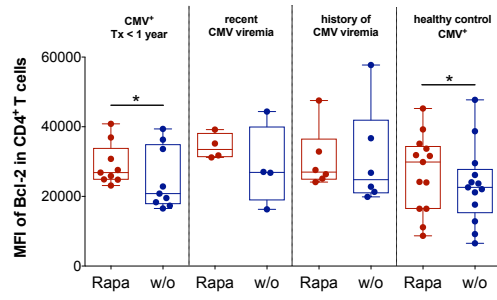**B****CD8<sup>+</sup> T-cells**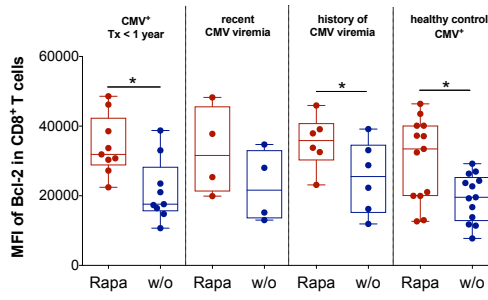**C**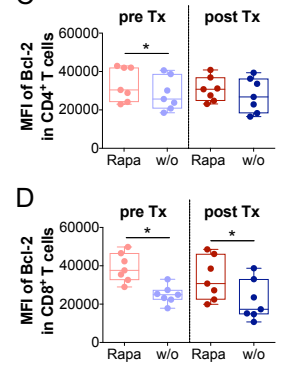**D**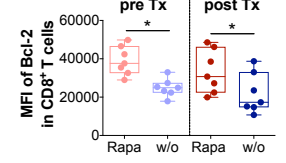**Figure S9: Bcl-2 is increased also in patient TCPs, especially in CD8<sup>+</sup> T-cells.**

MFI of Bcl-2 in CD4<sup>+</sup> (A) and CD8<sup>+</sup> (B) T-cells of untreated (w/o, blue) and Rapa (red)-TCPs of n = 19 patients (9 with so far no recorded CMV viremia; 4 with recent CMV viremia and 6 with a history of CMV viremia)/13 healthy controls. MFI of Bcl-2 in CD4<sup>+</sup> (C) and CD8<sup>+</sup> (D) T-cells of untreated (w/o, blue) and Rapa (red)-TCPs of n = 7 patients for which TCPs were generated before and a few weeks after KTx.
